# Supplementary material for: Design, Synthesis, and Neurotrophic Effect of Arg-Glu-Arg-Met-Ser-(3,5)-Dimethyladamantan-1-Amine In Vitro Evaluations as a Potential NMDAR Antagonist
Source: Hindawi journal article supplement (doi:10.1155/2023/8838634), 2023-08-21

**SUPPLEMENTARY MATERIALS**

**Design, synthesis, and neurotrophic effect of Arg-Glu-Arg-Met-Ser-(3,5)- dimethyladamantan-1-amine in vitro evaluations as a potential NMDAR antagonist**

Xiaozhen Wanga, Ze Lib, Xiaoyi Zhangc, Meimei Kanga, Caizhen Lva, Xu Zhanga, Zhiwei Zhaoa, Yanchuan Wua, Penghui Songa, Rong Wang*,a,d

aDepartment of Central Laboratory, Xuanwu Hospital of Capital Medical University, National Clinical Research Center for Geriatric Diseases, Beijing Geriatric Medical Research Center, Beijing, China

bDepartment of Pharmacy, Beijing Friendship Hospital, Capital Medical University, Beijing, China

cSchool of Pharmaceutical Sciences, Capital Medical University, Beijing, China

dCenter of Alzheimer’s Disease, Beijing Institute for Brain Disorders, Beijing, China

*Correspondence to: Rong Wang, PhD, No.45, Changchun Street, Beijing 100053, P.R. China. Tel: +86-10-6315-9572, E-mail: wangrong@xwh.ccmu.edu.cn

**List of supplementary content**

Figure S1.ESI(+)-FT-ICR-MS of RERMS-MEM

Figure S2. 1H NMR of RERMS-MEM

Figure S3. 13C NMR of RERMS-MEM

Figure S4.HPLC of RERMS-MEM

Figure S5.ESI(+)-Q-TOF-MS of N-Boc-Arg(NO2)-Glu(OBzl)-Arg(NO2)-Met-Ser-(3,5)-dimethyladamantan-1-amine

Figure S6. 1H NMR of N-Boc-Arg(NO2)-Glu(OBzl)-Arg(NO2)-Met-Ser-(3,5)-dimethyladamantan-1-amine

Figure S1.ESI(+)-FT-ICR-MS of RERMS-MEM


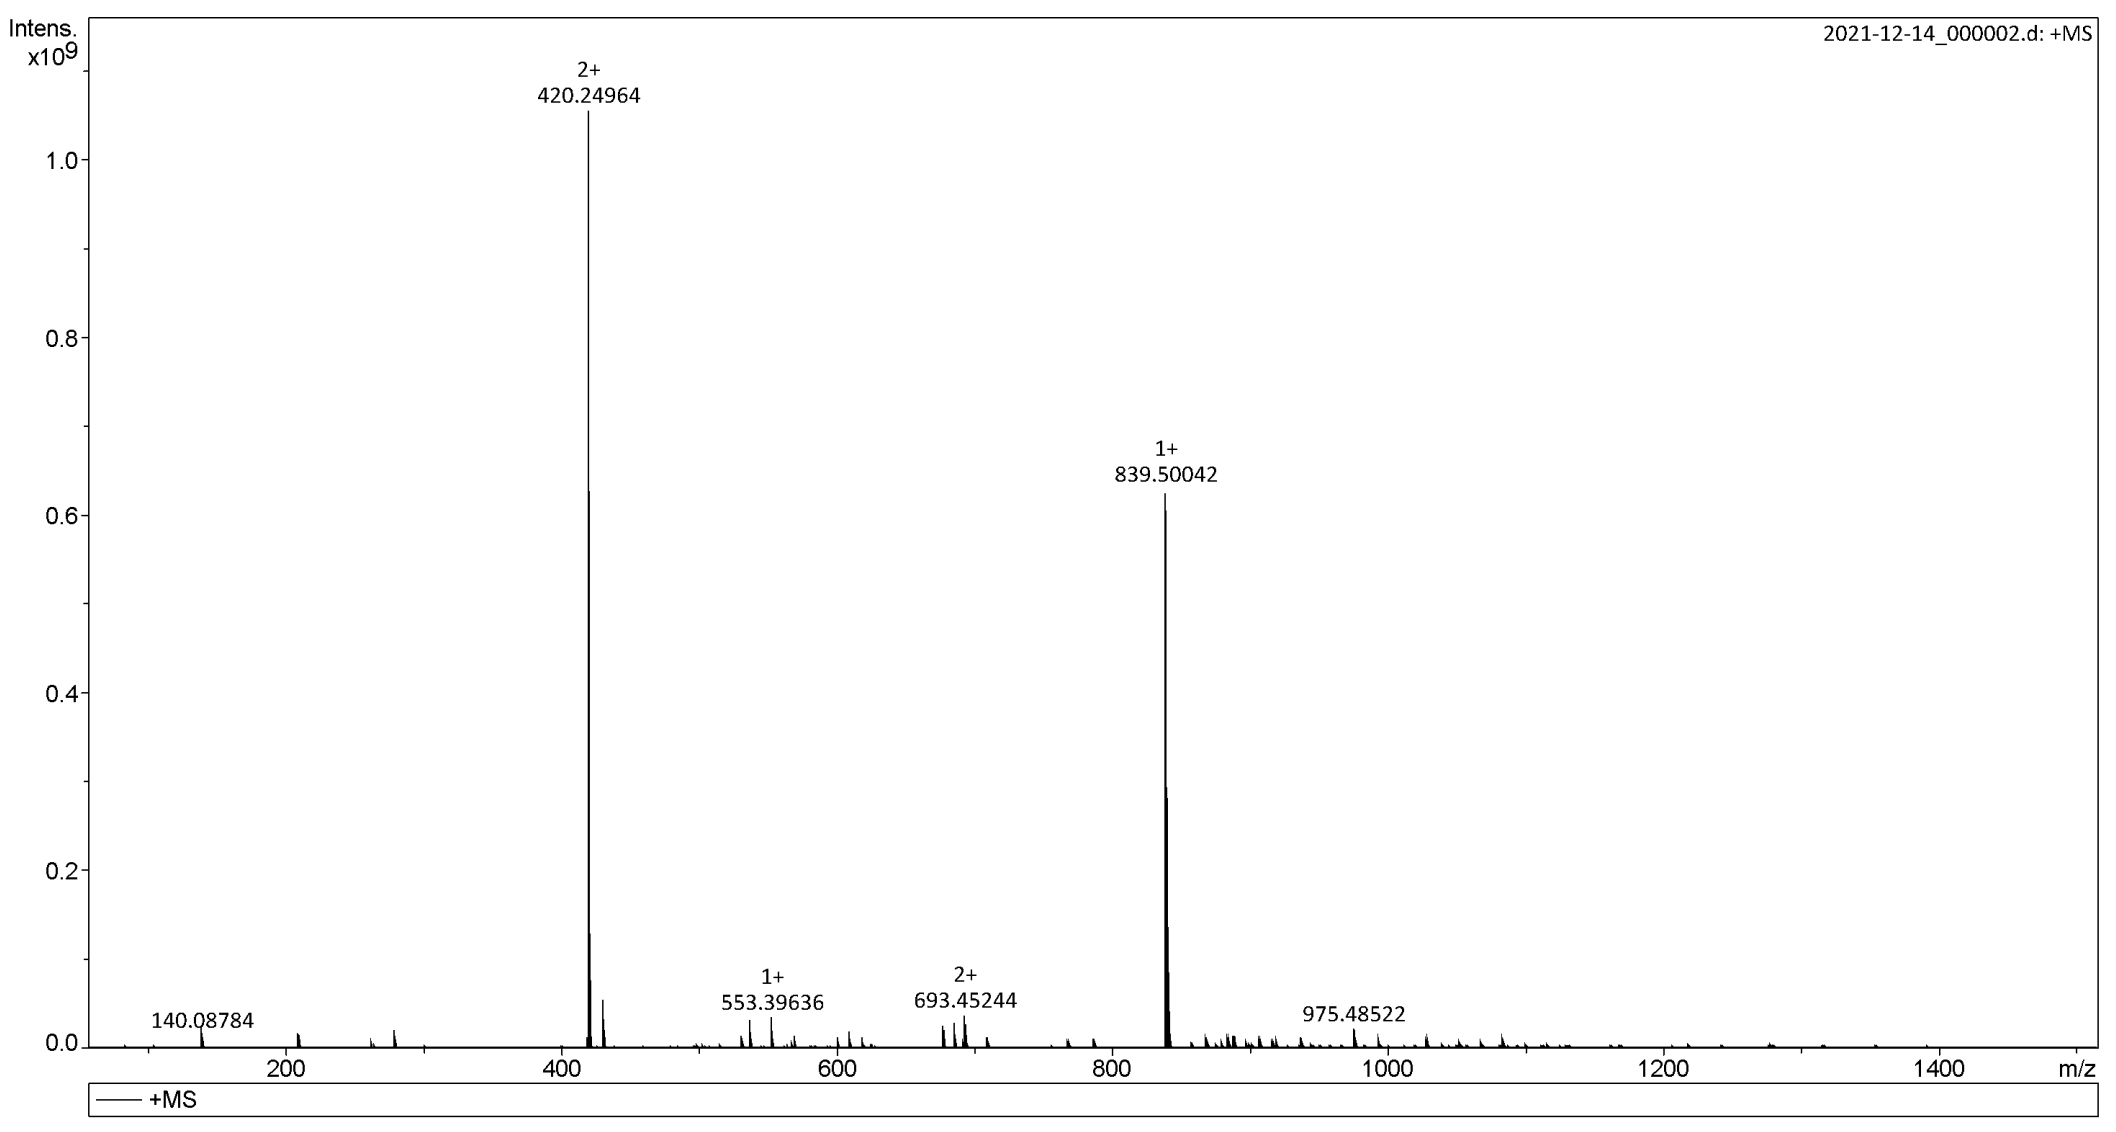


Figure S2. 1H NMR of RERMS-MEM


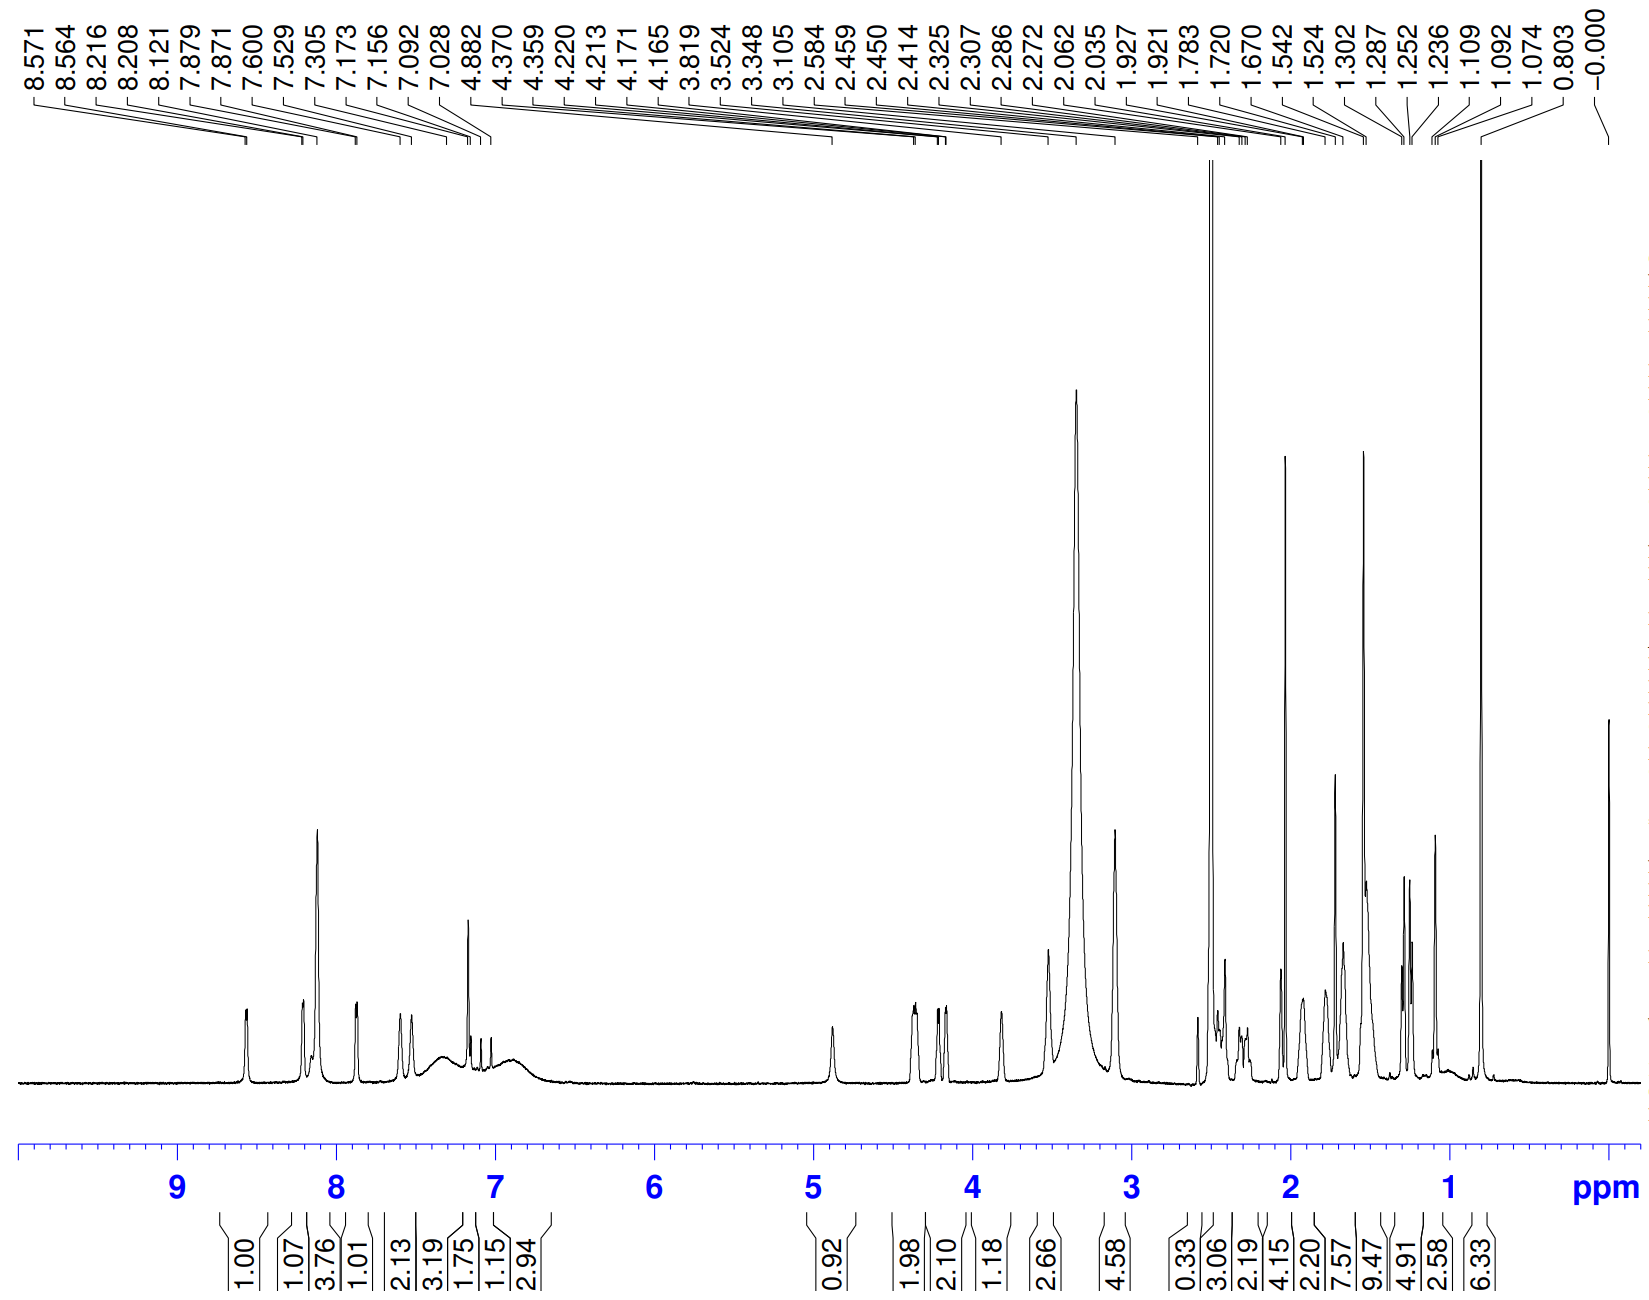


Figure S3. 13C NMR of RERMS-MEM


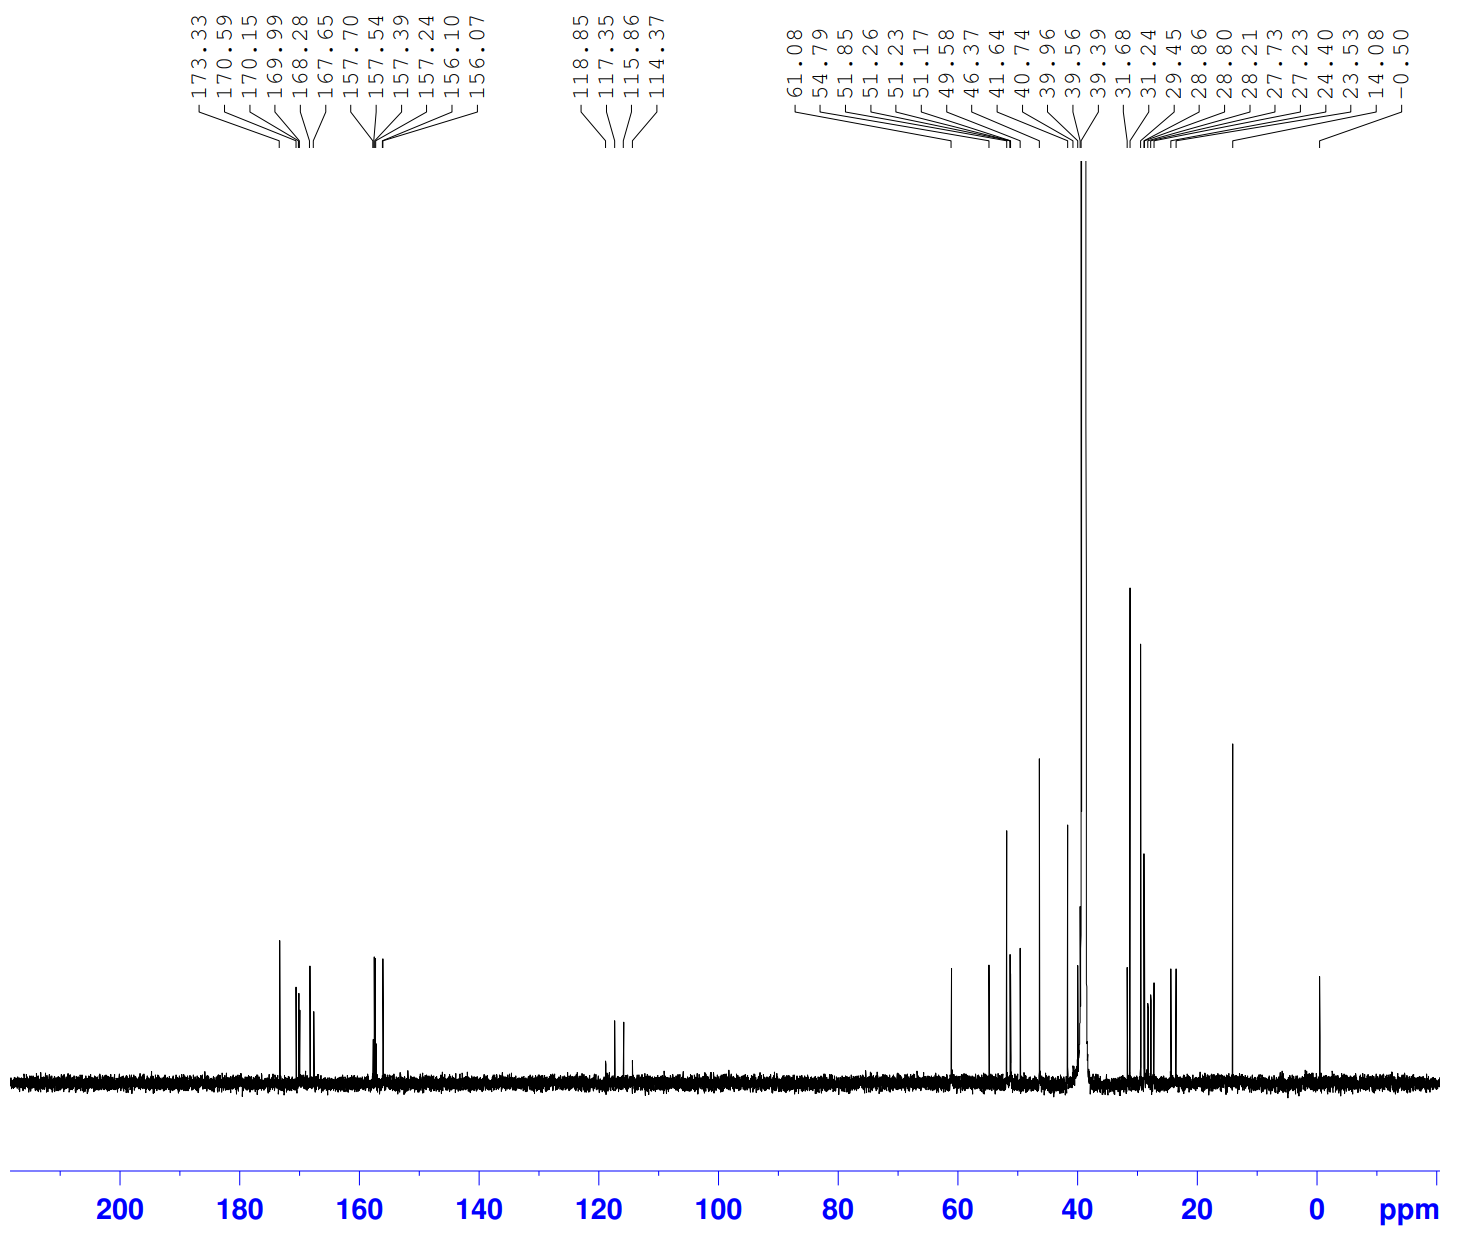


Figure S4.HPLC of RERMS-MEM


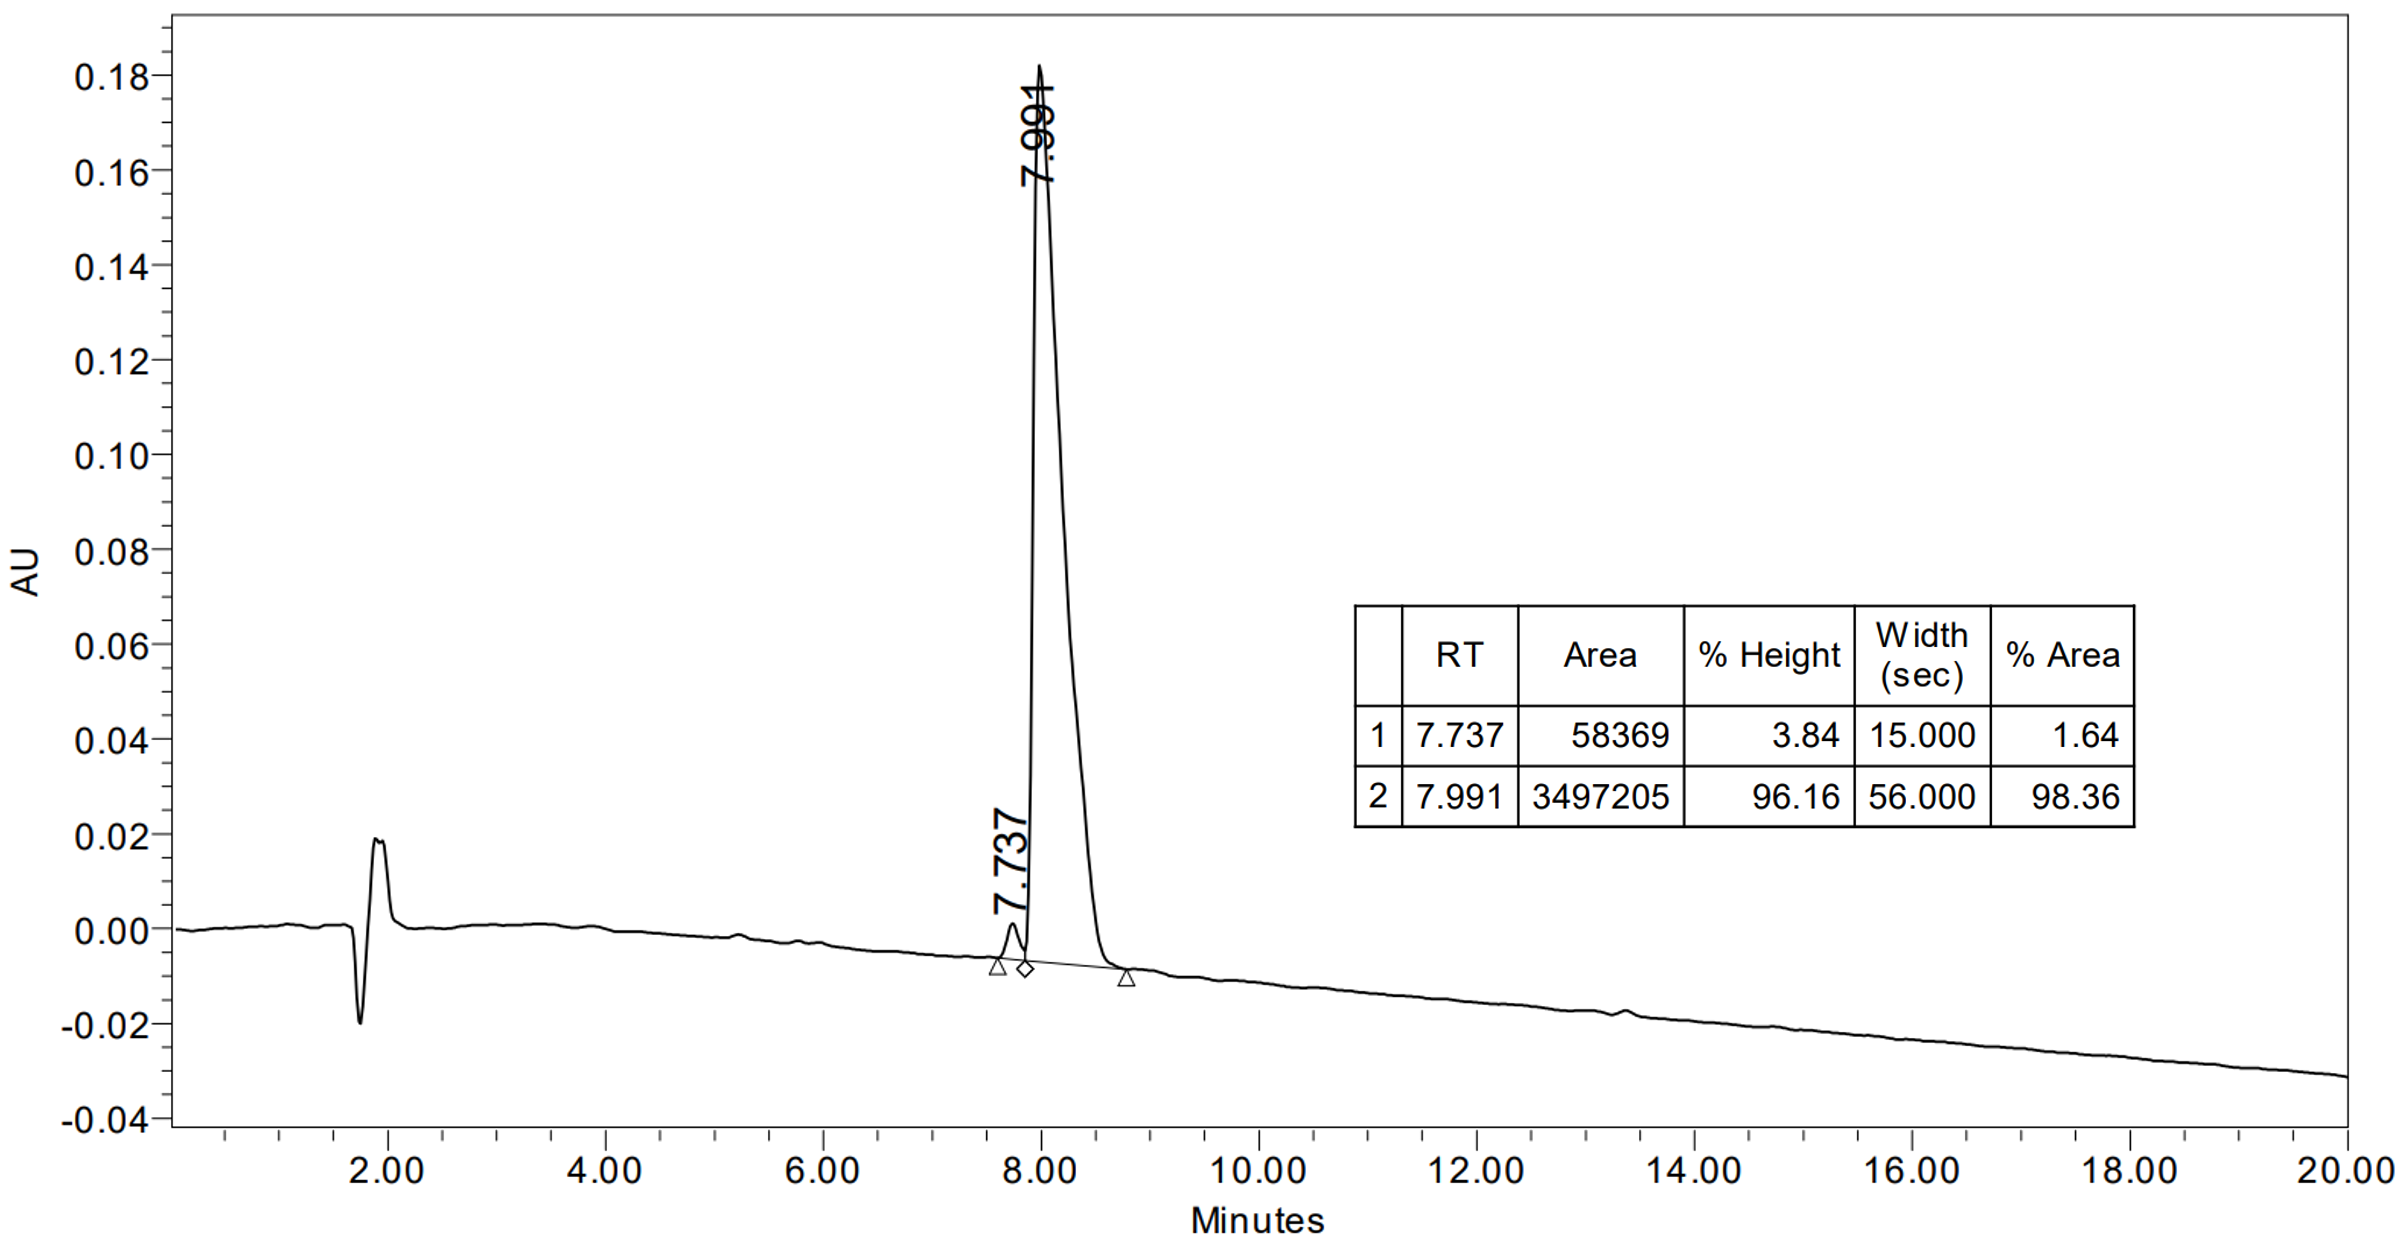


Figure S5.ESI(+)-Q-TOF-MS of N-Boc-Arg(NO2)-Glu(OBzl)-Arg(NO2)-Met-Ser-(3,5)-dimethyladamantan-1-amine


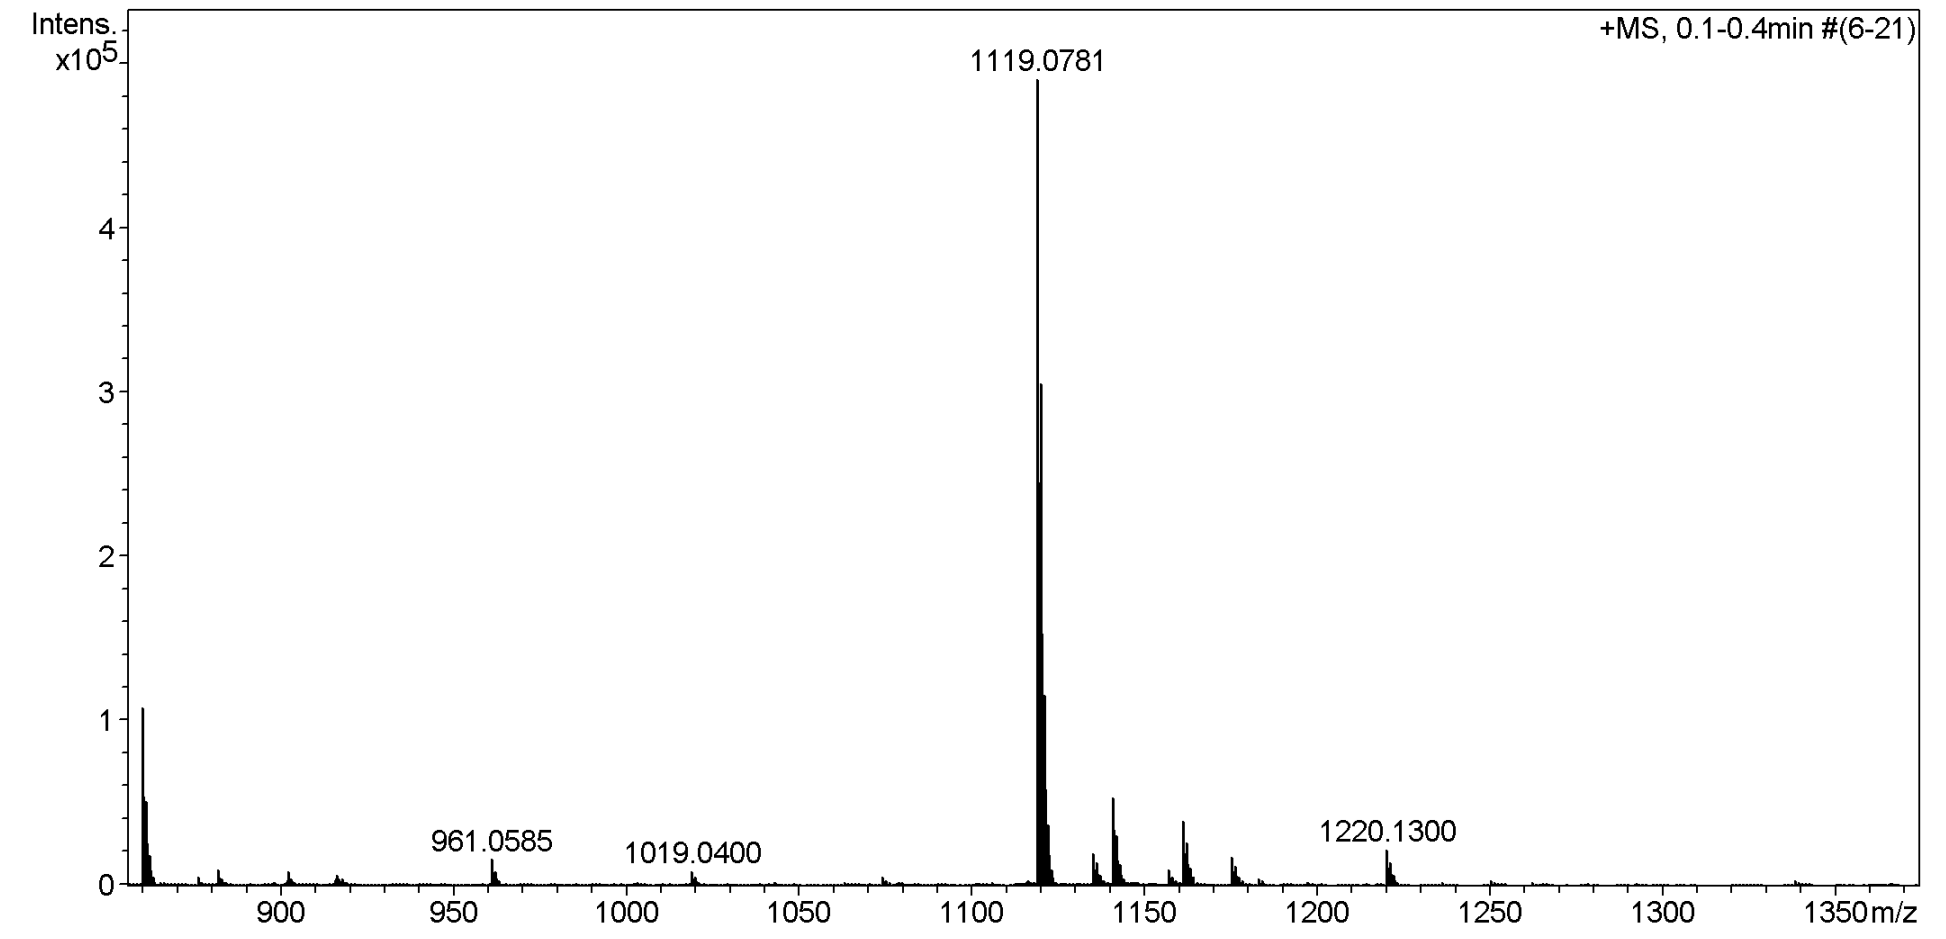


Figure S6. 1H NMR of N-Boc-Arg(NO2)-Glu(OBzl)-Arg(NO2)-Met-Ser-(3,5)-dimethyladamantan-1-amine


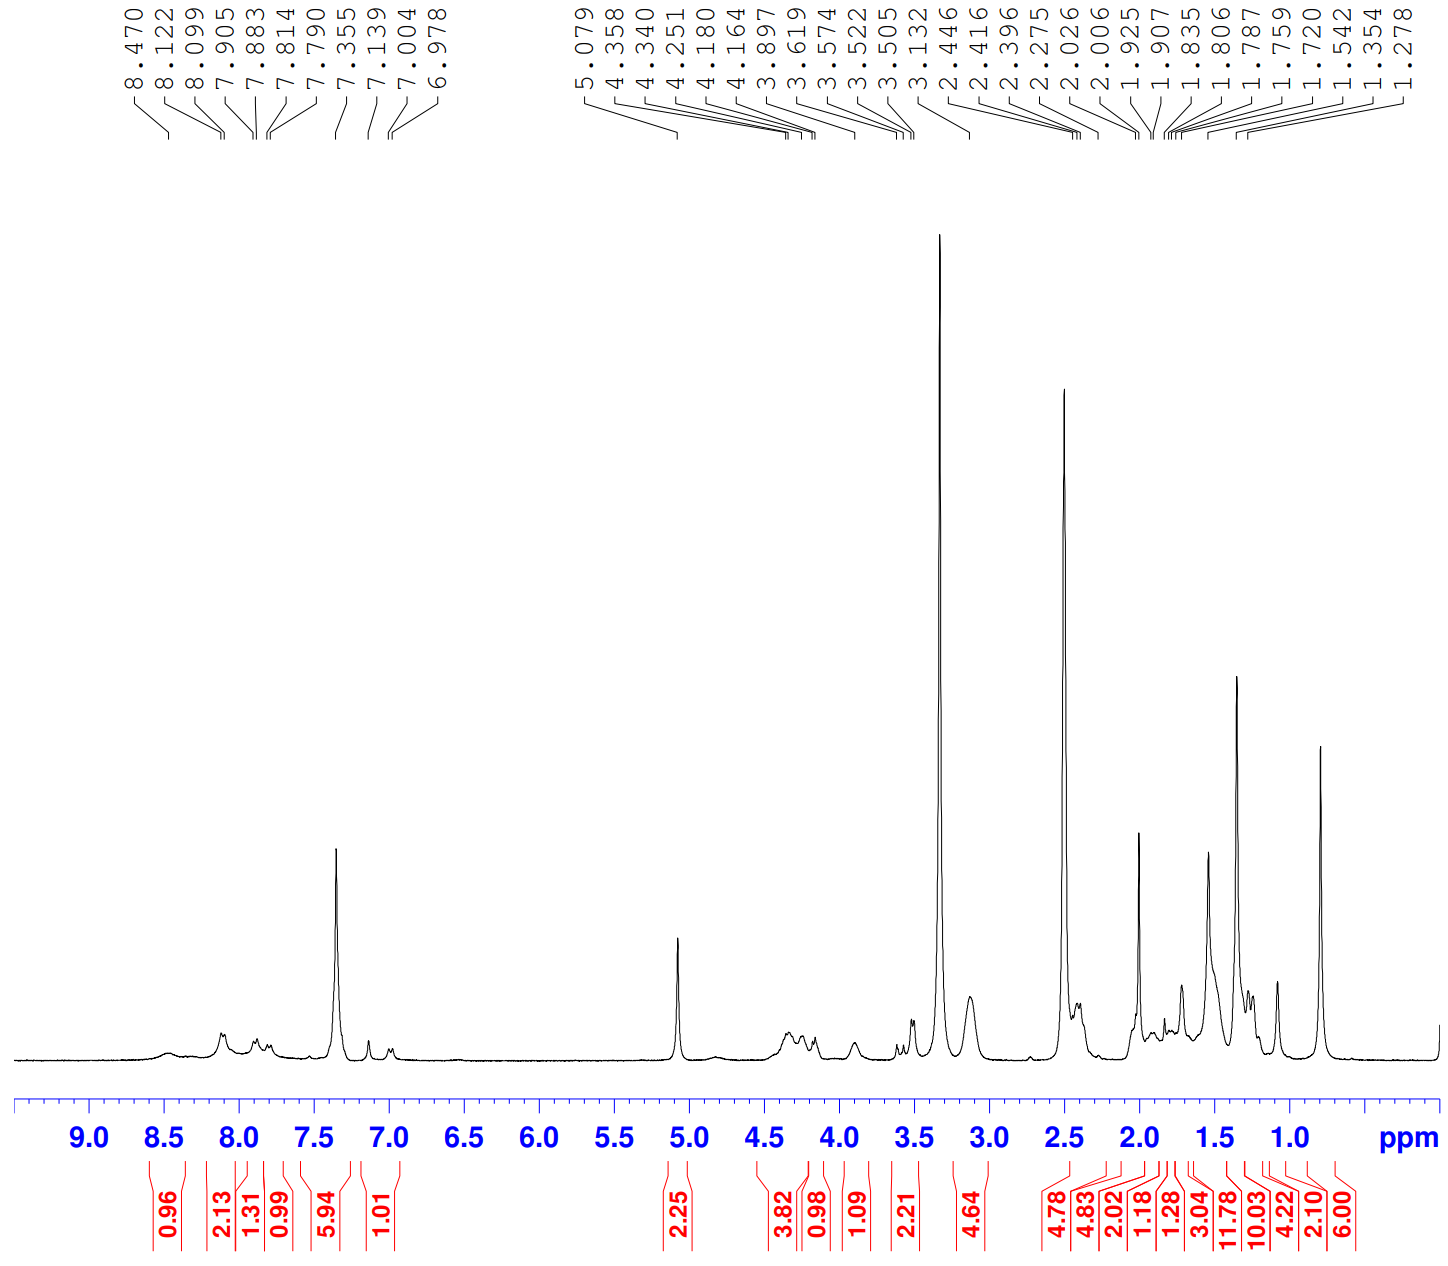

Supplement: f1 [file 8838634.f1.docx]
